# Supplementary material for: Gauging electronic dissymmetry in bis-chelates of titanium(iv) using sterically and electronically variable 2,2′-biphenoxides
Source: Royal Society of Chemistry journal article supplement (doi:10.1039/c0sc00468e), 2010-10-27
Supplement: c0sc00468e.pdf [file c0sc00468e.pdf]

*Electronic Supporting Information for:*

**Gauging electronic dissymmetry in bis-chelates of titanium(IV) using sterically and electronically variable 2,2'-biphenoxides**

Natcharee Kongprakaiwoot, Mauricio Quiroz-Guzman, Allen G. Oliver and Seth N. Brown

*251 Nieuwland Science Hall  
Department of Chemistry and Biochemistry  
University of Notre Dame  
Notre Dame, Indiana 46556-5670 USA  
E-mail: Seth.N.Brown.114@nd.edu*

*Contents:*

|                                                                                                                                                                                                                                                                                                                                                                                             |     |
|---------------------------------------------------------------------------------------------------------------------------------------------------------------------------------------------------------------------------------------------------------------------------------------------------------------------------------------------------------------------------------------------|-----|
| <b>I. Preparation and Characterization of Compounds</b>                                                                                                                                                                                                                                                                                                                                     | S2  |
| General Procedures                                                                                                                                                                                                                                                                                                                                                                          | S2  |
| (Bob)Ti(O <sub>2</sub> C <sub>12</sub> H <sub>4</sub> Br <sub>4</sub> )                                                                                                                                                                                                                                                                                                                     | S2  |
| (Hox)Ti(O <sub>2</sub> C <sub>12</sub> H <sub>4</sub> Br <sub>4</sub> )                                                                                                                                                                                                                                                                                                                     | S3  |
| (Hob)Ti(O <sub>2</sub> C <sub>12</sub> H <sub>4</sub> Br <sub>4</sub> )                                                                                                                                                                                                                                                                                                                     | S4  |
| (Bob)Ti(O <sub>2</sub> C <sub>12</sub> H <sub>4</sub> [CH <sub>3</sub> ] <sub>4</sub> )                                                                                                                                                                                                                                                                                                     | S4  |
| (Hox)Ti(O <sub>2</sub> C <sub>12</sub> H <sub>4</sub> [CH <sub>3</sub> ] <sub>4</sub> )                                                                                                                                                                                                                                                                                                     | S5  |
| (Hob)Ti(O <sub>2</sub> C <sub>12</sub> H <sub>4</sub> [CH <sub>3</sub> ] <sub>4</sub> )                                                                                                                                                                                                                                                                                                     | S6  |
| (Bob)Ti(O <sub>2</sub> C <sub>12</sub> H <sub>4</sub> [NO <sub>2</sub> ] <sub>4</sub> )                                                                                                                                                                                                                                                                                                     | S7  |
| (Hox)Ti(O <sub>2</sub> C <sub>12</sub> H <sub>4</sub> [NO <sub>2</sub> ] <sub>4</sub> )                                                                                                                                                                                                                                                                                                     | S7  |
| (Hob)Ti(O <sub>2</sub> C <sub>12</sub> H <sub>4</sub> [NO <sub>2</sub> ] <sub>4</sub> )                                                                                                                                                                                                                                                                                                     | S8  |
| (Bob)Ti(O <sub>2</sub> C <sub>12</sub> H <sub>4</sub> tBu <sub>4</sub> )                                                                                                                                                                                                                                                                                                                    | S9  |
| (Hox)Ti(O <sub>2</sub> C <sub>12</sub> H <sub>4</sub> tBu <sub>4</sub> )                                                                                                                                                                                                                                                                                                                    | S10 |
| (Hob)Ti(O <sub>2</sub> C <sub>12</sub> H <sub>4</sub> tBu <sub>4</sub> )                                                                                                                                                                                                                                                                                                                    | S10 |
| <b>II. X-ray Crystallography</b>                                                                                                                                                                                                                                                                                                                                                            | S12 |
| X-ray crystallography of (Bob)Ti(O <sub>2</sub> C <sub>12</sub> H <sub>4</sub> [CH <sub>3</sub> ] <sub>4</sub> ) • 0.5 C <sub>6</sub> H <sub>14</sub>                                                                                                                                                                                                                                       | S12 |
| X-ray crystallography of (Hox)Ti(O <sub>2</sub> C <sub>12</sub> H <sub>4</sub> [CH <sub>3</sub> ] <sub>4</sub> ) • CD <sub>2</sub> Cl <sub>2</sub> , (Hob)Ti(O <sub>2</sub> C <sub>12</sub> H <sub>4</sub> [CH <sub>3</sub> ] <sub>4</sub> ) • CDCl <sub>3</sub> and (Hob)Ti(O <sub>2</sub> C <sub>12</sub> H <sub>4</sub> [NO <sub>2</sub> ] <sub>4</sub> ) • 2 CHCl <sub>3</sub>          | S12 |
| <b>Table S1.</b> Crystal data for (Bob)Ti(O <sub>2</sub> C <sub>12</sub> H <sub>4</sub> [CH <sub>3</sub> ] <sub>4</sub> ) • 0.5 C <sub>6</sub> H <sub>14</sub>                                                                                                                                                                                                                              | S14 |
| <b>Table S2.</b> Crystal data for (Hox)Ti(O <sub>2</sub> C <sub>12</sub> H <sub>4</sub> [CH <sub>3</sub> ] <sub>4</sub> ) • CD <sub>2</sub> Cl <sub>2</sub> , (Hob)Ti(O <sub>2</sub> C <sub>12</sub> H <sub>4</sub> [CH <sub>3</sub> ] <sub>4</sub> ) • CDCl <sub>3</sub> and (Hob)Ti(O <sub>2</sub> C <sub>12</sub> H <sub>4</sub> [NO <sub>2</sub> ] <sub>4</sub> ) • 2 CHCl <sub>3</sub> | S15 |
| <b>III. DFT Calculations</b>                                                                                                                                                                                                                                                                                                                                                                | S16 |
| A. General Considerations                                                                                                                                                                                                                                                                                                                                                                   | S16 |
| B. (acac) <sub>2</sub> TiCl <sub>2</sub> ( <i>cis</i> )                                                                                                                                                                                                                                                                                                                                     | S16 |
| C. (CH <sub>3</sub> CON[CH <sub>3</sub> ]O) <sub>2</sub> TiCl <sub>2</sub> ( <i>cis</i> -α, equatorial carbonyls)                                                                                                                                                                                                                                                                           | S17 |
| D. (CH <sub>3</sub> CON[CH <sub>3</sub> ]O)(acac)TiCl <sub>2</sub> ( <i>cis</i> , equatorial carbonyl)                                                                                                                                                                                                                                                                                      | S17 |
| <b>References</b>                                                                                                                                                                                                                                                                                                                                                                           | S19 |

## I. Preparation and Characterization of Compounds

**General procedures.** Chloroform and methylene chloride were dried over 4 Å molecular sieves, followed by  $\text{CaH}_2$ . Benzene and toluene were dried over sodium, and ether and tetrahydrofuran over sodium benzophenone ketyl. Deuterated solvents were obtained from Cambridge Isotope Laboratories, dried using the same procedure as their protio analogues, and stored in the drybox prior to use. 3,3',5,5'-Tetramethyl-2,2'-biphenol was purchased from Strem Chemicals; the other 3,3',5,5'-tetrasubstituted biphenols  $\text{C}_{12}\text{H}_4\text{Br}_4(\text{OH})_2$ ,<sup>S1</sup>  $\text{C}_{12}\text{H}_4(\text{NO}_2)_4(\text{OH})_2$ ,<sup>S2</sup> and  $\text{C}_{12}\text{H}_4(\text{tBu})_4(\text{OH})_2$ <sup>S3</sup> were prepared by published routes, as were the bis(diketonate) complex  $(\text{Bob})\text{Ti}(\text{O}^i\text{Pr})_2$ <sup>S4</sup> and the hydroxamate complexes  $(\text{Hox})\text{Ti}(\text{O}^i\text{Pr})_2$  and  $(\text{Hob})\text{Ti}(\text{O}^i\text{Pr})_2$ .<sup>S5</sup> All other reagents were commercially available and used without further purification. NMR spectra were measured on a Varian VXR-300 or VXR-500 spectrometer. Chemical shifts for  $^1\text{H}$  and  $^{13}\text{C}\{^1\text{H}\}$  spectra are reported in ppm downfield of TMS, referenced to the chemical shifts of the solvent residuals. All NMR spectra were taken at 20 °C unless otherwise indicated. Infrared spectra were recorded on KBr plates on a Perkin-Elmer PARAGON 1000 FT-IR or a Nicolet NEXUS 670 FT-IR spectrometer. Mass spectra were obtained on a JEOL LMS-AX505HA mass spectrometer using the FAB ionization mode and 3-nitrobenzyl alcohol or nitrophenyl octyl ether as a matrix. Peaks reported are the mass number of the most intense peak of the isotope envelopes. Elemental analyses were performed by M-H-W Laboratories (Phoenix, AZ).

**$(\text{Bob})\text{Ti}(\text{O}_2\text{C}_{12}\text{H}_4\text{Br}_4)$ .** In the drybox,  $(\text{Bob})\text{Ti}(\text{O}^i\text{Pr})_2$  (0.0715 g, 0.107 mmol), 3,3',5,5'-tetrabromo-2,2'-dihydroxybiphenyl (0.0542 g, 0.108 mmol), 5 mL of  $\text{CHCl}_3$  and a magnetic stirbar were charged into a scintillation vial. The mixture was stirred for 10 min, and then hexanes (3 mL) was added. The resulting orange precipitate was filtered, washed with  $2 \times 1$  mL hexanes and dried *in vacuo* for 1 h. Yield: 0.0831 g (74%).  $^1\text{H}$  NMR ( $\text{CD}_2\text{Cl}_2$ ):  $\delta$  2.42 (s, 6H,

tolyl  $\text{CH}_3$ ), 3.31 (d, 14 Hz, 2H,  $\text{CHH}'$ ), 4.11 (d, 14 Hz, 2H,  $\text{CHH}'$ ), 5.66 (s, 2H,  $\text{COCHCO}$ ), 7.16 (d, 7.5 Hz, 2H, 3-H biphenyl), 7.16 (td, 8, 2.5 Hz, 2H, 4-H biphenyl), 7.21 (d, 8 Hz, 4H, Tol 3,5-H), 7.43 (d, 7.5 Hz, 2H, 6-H biphenyl), 7.44 (d, 8 Hz, 4H, Tol 2,6-H), 7.45 (d, 2.5 Hz, 2H, 6,6'-H biphenolate), 7.50 (td, 8, 2.5 Hz, 2H, 5-H biphenyl), 7.72 (d, 2.5 Hz, 2H, 4,4'-H biphenolate).

$^{13}\text{C}\{^1\text{H}\}$  NMR ( $\text{CD}_2\text{Cl}_2$ ):  $\delta$  22.04 (tolyl  $\text{CH}_3$ ), 46.00 ( $\text{CH}_2$ ), 104.53 ( $\text{COCHCO}$ ), 113.38, 114.16, 127.88, 129.02, 129.09, 129.54, 129.68, 130.10, 131.50, 133.11, 133.64, 134.80, 136.68, 140.80, 145.01, 160.15, 182.06 (CO), 191.69 (CO). IR ( $\text{cm}^{-1}$ ): 2916 (w), 1608 (w), 1586 (w), 1550 (m), 1515 (s), 1498 (s), 1435 (m), 1388 (m), 1350 (m), 1322 (m), 1297 (w), 1287 (w), 1262 (m), 1184 (m), 1156 (w), 1052 (w), 984 (w), 863 (w), 767 (w), 720 (w). FABMS:  $m/z$  1044 ( $\text{M}^+$ ,  $^{79}\text{Br}_4$  isotopomer). Anal. Calcd for  $\text{C}_{46}\text{H}_{32}\text{Br}_4\text{O}_6\text{Ti}$ : C, 52.71; H, 3.08. Found: C, 52.72; H, 3.35.

**(Hox)Ti(O<sub>2</sub>C<sub>12</sub>H<sub>4</sub>Br<sub>4</sub>).** This compound was prepared by the procedure described above using (Hox)Ti(O<sup>*i*</sup>Pr)<sub>2</sub> (0.0727 g, 0.147 mmol) and 3,3',5,5'-tetrabromo-2,2'-dihydroxybiphenyl (0.0745 g, 0.148 mmol). After stirring for 10 min, the resulting yellow precipitate was filtered and redissolved in ~15 mL of hot  $\text{CH}_2\text{Cl}_2$ . The product precipitated as a yellow solid on standing at 10 °C overnight. Isolation by filtration, washing with 2 × 1 mL hexanes and drying *in vacuo* for 1 h yielded 0.0292 g (23%) of the product.  $^1\text{H}$  NMR ( $\text{CD}_2\text{Cl}_2$ ):  $\delta$  2.85 (s, 6H,  $\text{NCH}_3$ ), 3.51 (d, 16 Hz, 2H,  $\text{CHH}'$ ), 4.19 (d, 16 Hz, 2H,  $\text{CHH}'$ ), 7.29 (m, 2H, Ar-H biphenyl), 7.30 (d, 2.5 Hz, 2H, 6-H biphenol), 7.49 (m, 6H, Ar-H biphenyl), 7.60 (d, 2.5 Hz, 2H, 4-H biphenol).  $^{13}\text{C}\{^1\text{H}\}$  NMR ( $\text{CD}_2\text{Cl}_2$ ):  $\delta$  34.96 ( $\text{NCH}_3$ ), 38.62 ( $\text{CH}_2$ ), 113.09, 114.29, 121.05, 128.58, 129.05, 130.32, 132.68, 133.12, 134.55, 135.09, 139.52, 158.40, 165.69 (CO). IR ( $\text{cm}^{-1}$ ): 3061 (w), 3015 (w), 2989 (w), 2932 (w), 1582 (s,  $\nu_{\text{CO}}$ ), 1475 (w), 1463 (w), 1437 (s), 1413 (s), 1392 (s), 1248 (s), 1056 (m), 868 (w), 856 (m), 840 (w), 824 (w), 769 (m), 756 (m), 743 (m), 717 (m). FABMS:  $m/z$  870 ( $\text{M}^+$ ,

$^{79}\text{Br}_4$  isotopomer). Anal. Calcd for  $\text{C}_{30}\text{H}_{22}\text{Br}_4\text{N}_2\text{O}_6\text{Ti}$ : C, 41.23; H, 2.54; N, 3.21. Found: C, 41.45; H, 2.70; N, 3.27.

**(Hob)Ti(O<sub>2</sub>C<sub>12</sub>H<sub>4</sub>Br<sub>4</sub>)**. This compound was prepared by the procedure described above using (Hob)Ti(O<sup>*i*</sup>Pr)<sub>2</sub> (0.0608 g, 0.105 mmol) and 3,3',5,5'-tetrabromo-2,2'-dihydroxybiphenyl (0.0530 g, 0.106 mmol). After stirring for 30 min, the resulting orange precipitate was filtered, washed with 2 × 1 mL hexanes and dried *in vacuo* for 1 h. Yield: 0.0727 g (72%). <sup>1</sup>H NMR (CD<sub>2</sub>Cl<sub>2</sub>): δ 2.39 (s, 3H, tolyl CH<sub>3</sub>), 2.65 (s, 3H, NCH<sub>3</sub>), 3.37 (d, 15 Hz, 1H, CH<sub>c</sub>H<sub>d</sub>COCHCOTol), 3.58 (d, 15 Hz, 1H, CH<sub>a</sub>H<sub>b</sub>CON(CH<sub>3</sub>)O), 4.11 (d, 15 Hz, 1H, CH<sub>c</sub>H<sub>d</sub>COCHCOTol), 4.20 (d, 15 Hz, 1H, CH<sub>a</sub>H<sub>b</sub>CON(CH<sub>3</sub>)O), 5.88 (s, 1H, COCHCO), 7.20 (d, 9 Hz, 2H, Tol 3,5-H), 7.36 (d, 2.5 Hz, 1H, 6-H biphenolate), 7.39 (d, 2.5 Hz, 1H, 6'-H biphenolate), 7.41 (m, 8H, Ar-H biphenyl), 7.51 (d, 9 Hz, 2H, Tol 2,6-H), 7.64 (d, 2.5 Hz, 1H, 4-H biphenolate), 7.69 (d, 2.5 Hz, 1H, 4'-H biphenolate). <sup>13</sup>C{<sup>1</sup>H} NMR (CD<sub>2</sub>Cl<sub>2</sub>): δ 21.97 (tolyl CH<sub>3</sub>), 34.98 (NCH<sub>3</sub>), 38.78 (CH<sub>2</sub> hydroxamate), 46.06 (CH<sub>2</sub> diketonate), 103.79 (COCHCO), 112.94, 113.57, 114.08, 114.30, 128.37, 128.41, 128.77, 128.87, 128.90, 129.11, 129.46, 129.74, 130.08, 130.46, 131.67, 132.72, 132.89, 132.95, 134.05, 134.43, 134.99, 136.98, 139.76, 140.50, 144.80, 159.01, 159.35, 164.56 (CO hydroxamate), 181.53 (CO diketonate), 194.13 (CO diketonate). IR (cm<sup>-1</sup>): 3056 (w), 3020 (w), 2942 (w), 2916 (w), 1583 (m, ν<sub>CO</sub>), 1549 (m), 1520 (s), 1496 (s), 1436 (s), 1389 (s), 1350 (m), 1332 (m), 1291 (w), 1263 (s), 1186 (m), 1161 (w), 1096 (w), 1052 (m), 984 (w), 886 (w), 860 (m), 824 (m), 766 (m), 754 (w), 741 (w), 718 (m). FABMS: *m/z* 957 (M<sup>+</sup>,  $^{79}\text{Br}_4$  isotopomer). Anal. Calcd for  $\text{C}_{38}\text{H}_{27}\text{Br}_4\text{NO}_6\text{Ti}$ : C, 47.49; H, 2.83; N, 1.46. Found: C, 47.24; H, 3.05; N, 1.42.

**(Bob)Ti(O<sub>2</sub>C<sub>12</sub>H<sub>4</sub>[CH<sub>3</sub>]<sub>4</sub>)**. In the drybox, (Bob)Ti(O<sup>*i*</sup>Pr)<sub>2</sub> (0.1000 g, 0.1504 mmol) was charged into a scintillation vial with a magnetic bar and dissolved in 10 mL of CH<sub>2</sub>Cl<sub>2</sub>. 3,3',5,5'-

Tetramethyl-2,2'-dihydroxybiphenyl (0.0363 g, 0.150 mmol) was weighed into a separate vial, dissolved in 5 mL of  $\text{CH}_2\text{Cl}_2$  and added dropwise with vigorous stirring to the  $(\text{Bob})\text{Ti}(\text{O}^i\text{Pr})_2$  solution. The resulting pale red mixture was stirred for 44 h at room temperature and the solvent evaporated *in vacuo* to yield a sticky red solid. This solid was crushed with hexanes (15 mL), filtered, washed with hexanes ( $2 \times 5$  mL) and dried *in vacuo* for 1 h. Yield: 0.0972 g (82%).  $^1\text{H}$  NMR ( $\text{CDCl}_3$ ):  $\delta$  2.14 (s, 6H, biphenolate  $\text{CH}_3$ ), 2.38 (s, 6H, biphenolate  $\text{CH}_3$ ), 2.41 (s, 6H, tolyl  $\text{CH}_3$ ), 3.25 (d, 13 Hz, 2H,  $\text{CHH}'$ ), 4.03 (d, 13 Hz, 2H,  $\text{CHH}'$ ), 5.54 (s, 2H,  $\text{COCHCO}$ ), 7.00 (s, 2H, 4,4'-H biphenolate), 7.09 (s, 2H, 6,6'-H biphenolate), 7.14 (d, 8 Hz, 4H, Tol 3,5-H), 7.18 (m, 4H, biphenyl), 7.41 (m, 6H, Tol 2,6-H and biphenyl ArH), 7.50 (t, 8 Hz, 2H, 4- or 5-H biphenyl).  $^{13}\text{C}\{^1\text{H}\}$  NMR ( $\text{CDCl}_3$ ):  $\delta$  17.44 (biphenolate  $\text{CH}_3$ ), 21.16 (biphenolate  $\text{CH}_3$ ), 21.88 (tolyl  $\text{CH}_3$ ), 46.10 ( $\text{CH}_2$ ), 102.83 ( $\text{COCHCO}$ ), 124.51, 127.14, 127.26, 128.64, 129.02, 129.29, 129.64, 129.77, 130.45, 132.13, 133.44, 136.81, 140.57, 143.21, 161.10, 181.05 (CO), 190.92 (CO). IR (nujol mull,  $\text{cm}^{-1}$ ): 1653 (w), 1588 (m), 1554 (m), 1499 (m), 1323 (w), 1248 (w), 1496 (w) 1419 (m), 1184 (w), 1160 (m), 982 (m), 833 (m), 744 (m). FABMS:  $m/z$  788 ( $\text{M}^+$ ). Anal. Calcd for  $\text{C}_{50}\text{H}_{44}\text{O}_6\text{Ti}$ : C, 76.14; H, 5.62. Found: C, 74.34; H, 6.08.

**$(\text{Hox})\text{Ti}(\text{O}_2\text{C}_{12}\text{H}_4[\text{CH}_3]_4)$ .** This compound was prepared by the procedure described above for  $(\text{Bob})\text{Ti}(\text{O}_2\text{C}_{12}\text{H}_4[\text{CH}_3]_4)$ , using  $(\text{Hox})\text{Ti}(\text{O}^i\text{Pr})_2$  (0.1000 g, 0.2031 mmol) and 3,3',5,5'-tetramethyl-2,2'-dihydroxybiphenyl (0.0492 g, 0.203 mmol). After stirring for 2 h, the resulting yellow cloudy suspension was stripped down *in vacuo* to yield a crude yellow solid. This solid was crushed with hexanes (15 mL), filtered, washed with hexanes ( $2 \times 5$  mL) and dried *in vacuo* for 1 h. Yield: 0.1105 g (88%). The complex is only sparingly soluble in chlorinated solvents and insoluble in other solvents.  $^1\text{H}$  NMR ( $\text{CDCl}_3$ ):  $\delta$  2.24 (s, 6H,  $\text{CH}_3$  biphenolate), 2.26 (s, 6H,  $\text{CH}_3$  biphenolate), 2.77 (s, 6H,  $\text{NCH}_3$ ), 3.41 (d, 16 Hz, 2H,  $\text{CHH}'$ ), 4.08 (d, 16 Hz, 2H,  $\text{CHH}'$ ),

6.87 (d, 2 Hz, 2H, biphenolate ArH), 6.94 (d, 2 Hz, 2H, biphenolate ArH), 7.25 (m, 2H, biphenyl ArH), 7.42 (m, 4H, biphenyl ArH), 7.49 (m, 2H, biphenyl ArH).  $^{13}\text{C}\{^1\text{H}\}$  NMR ( $\text{CDCl}_3$ ):  $\delta$  17.13 ( $\text{CH}_3$  biphenolate), 21.00 ( $\text{CH}_3$  biphenolate), 34.48 ( $\text{NCH}_3$ ), 38.03 ( $\text{CH}_2$ ), 125.38, 127.01, 127.81, 128.43, 129.04, 129.66, 129.91, 130.13, 133.38, 134.40, 139.32, 158.56, 164.16 (CO). IR (nujol mull,  $\text{cm}^{-1}$ ): 1588 (s,  $\nu_{\text{CO}}$ ), 1419 (s), 1255 (s), 1211 (s), 1162 (w), 1128 (m), 994 (w), 857 (m), 829 (s), 778 (m), 756 (s), 746 (s), 727 (m), 667 (m), 639 (w), 586 (w). FABMS:  $m/z$  615 ( $\text{M}+\text{H}$ ) $^+$ . Anal. Calcd for  $\text{C}_{34}\text{H}_{34}\text{N}_2\text{O}_6\text{Ti}$ : C, 66.45; H, 5.58; N, 4.56. Found: C, 66.70; H, 5.44; N, 4.40.

**(Hob)Ti(O<sub>2</sub>C<sub>12</sub>H<sub>4</sub>[CH<sub>3</sub>]<sub>4</sub>).** This compound was prepared by the procedure described above, using (Hob)Ti(O<sup>i</sup>Pr)<sub>2</sub> (0.1000 g, 0.1725 mmol) and 3,3',5,5'-tetramethyl-2,2'-dihydroxybiphenyl (0.0418 g, 0.172 mmol). After stirring for 14 h, the solvent was evaporated from the orange solution and the orange residue was dried *in vacuo* for 1 h. The crude solid was stirred with hexanes (15 mL), filtered, washed with hexanes (2  $\times$  5 mL) and dried *in vacuo* for 1 h. Yield: 0.1072 g (89%).  $^1\text{H}$  NMR ( $\text{CDCl}_3$ ):  $\delta$  2.05 (s, 3H, biphenolate  $\text{CH}_3$ ), 2.29 (s, 3H, biphenolate  $\text{CH}_3$ ), 2.30 (s, 3H, biphenolate  $\text{CH}_3$ ), 2.34 (s, 3H, biphenolate  $\text{CH}_3$ ), 2.39 (s, 3H, tolyl  $\text{CH}_3$ ), 2.57 (s, 3H,  $\text{NCH}_3$ ), 3.25 (d, 15 Hz, 1H,  $\text{CH}_c\text{H}_d\text{COCHCOTol}$ ), 3.47 (d, 15 Hz, 1H,  $\text{CH}_a\text{H}_b\text{CON}(\text{CH}_3)\text{O}$ ), 4.02 (d, 15 Hz, 1H,  $\text{CH}_a\text{H}_b\text{CON}(\text{CH}_3)\text{O}$ ), 4.07 (d, 15 Hz, 1H,  $\text{CH}_c\text{H}_d\text{COCHCOTol}$ ), 5.71 (s, 1H,  $\text{COCHCO}$ ), 6.90 (s, br, 1H, 6-H biphenolate), 6.97 (s, br, 1H, 6'-H biphenolate), 6.99 (s, br, 1H, 4-H biphenolate), 7.03 (s, br, 1H, 4'-H biphenolate), 7.14 (d, 8 Hz, 2H, Tol 3,5-H), 7.33 (m, 6H, biphenyl ArH), 7.41 (d, 8 Hz, 2H, Tol 2,6-H), 7.47 (m, 2H, biphenyl ArH).  $^{13}\text{C}\{^1\text{H}\}$  NMR ( $\text{CDCl}_3$ ):  $\delta$  17.02 ( $\text{CH}_3$  biphenolate), 17.66 ( $\text{CH}_3$  biphenolate), 21.08 (tolyl  $\text{CH}_3$ ), 21.82 ( $\text{CH}_3$  biphenolate), 27.12 ( $\text{CH}_3$  biphenolate), 34.52 ( $\text{NCH}_3$ ), 38.09 ( $\text{CH}_2$  hydroxamate), 45.98 ( $\text{CH}_2$  diketonate), 102.27 ( $\text{COCHCO}$ ), 125.03, 125.07, 126.83, 127.42,

127.59, 127.62, 128.19, 128.31, 128.41, 129.07, 129.11, 129.18, 129.63, 129.79, 129.86, 129.87, 129.96, 130.47, 132.56, 132.96, 133.97, 134.00, 137.28, 139.62, 140.20, 143.06, 159.65 (biphenolate CO), 159.75 (biphenolate CO), 163.17, (CO hydroxamate), 181.00 (CO diketonate), 192.41 (CO diketonate). IR (nujol mull,  $\text{cm}^{-1}$ ): 1586 (s,  $\nu_{\text{CO}}$ ), 1555 (m), 1518 (s), 1255 (s), 1230 (m), 1185 (w), 1161 (m), 1095 (w), 981 (m), 836 (s), 753 (s), 744 (s), 721 (s), 624 (w). FABMS:  $m/z$  702 ( $\text{M}+\text{H}$ )<sup>+</sup>. Anal. Calcd for  $\text{C}_{42}\text{H}_{39}\text{NO}_6\text{Ti}$ : C, 71.90; H, 5.60; N, 2.00. Found: C, 72.00; H, 5.60; N, 2.05.

**(Bob)Ti(O<sub>2</sub>C<sub>12</sub>H<sub>4</sub>[NO<sub>2</sub>]<sub>4</sub>)**. This compound was prepared by the procedure described for the tetrabromo compound using (Bob)Ti(O<sup>*i*</sup>Pr)<sub>2</sub> (0.0611 g, 0.092 mmol) and 3,3',5,5'-tetranitro-2,2'-dihydroxybiphenyl (0.0339 g, 0.093 mmol). After stirring for 5 min, hexanes (3 mL) was added. The resulting yellow precipitate was filtered, washed with 2 × 1 mL of hexanes and dried *in vacuo* for 1 h. Yield: 56% (0.0468 g). <sup>1</sup>H NMR (CD<sub>2</sub>Cl<sub>2</sub>):  $\delta$  2.43 (s, 6H, tolyl CH<sub>3</sub>), 3.36 (d, 14 Hz, 2H, CHH'), 4.16 (d, 14 Hz, 2H, CHH'), 5.74 (s, 2H, COCHCO), 7.21 (d, 7 Hz, 2H, 3-H biphenyl), 7.21 (d, 9 Hz, 4H, Tol 3,5-H), 7.29 (d, 9 Hz, 4H, Tol 2,6-H), 7.44 (d, 7 Hz, 2H, 6-H biphenyl), 7.52 (m, 4H, 4-, 5-H biphenyl), 8.52 (d, 2.5 Hz, 2H, 6,6'-H biphenolate), 8.86 (d, 2.5 Hz, 2H, 4,4'-H biphenolate). <sup>13</sup>C{<sup>1</sup>H} NMR (CD<sub>2</sub>Cl<sub>2</sub>):  $\delta$  22.15 (tolyl CH<sub>3</sub>), 45.58 (CH<sub>2</sub>), 106.21 (COCHCO), 122.28, 128.21, 128.92, 129.37, 130.07, 130.13, 130.53, 130.65, 130.85, 133.81, 136.10, 139.14, 140.33, 140.65, 146.37, 162.00, 183.41 (CO), 191.83 (CO). IR ( $\text{cm}^{-1}$ ): 3085 (w), 2925 (w), 1579 (m), 1538 (s), 1511 (s), 1422 (m), 1336 (s), 1299 (m), 1284 (m), 1185 (m), 1092 (m), 984 (m), 951 (w), 848 (m), 834 (m), 790 (m), 745 (m), 718 (w). FABMS:  $m/z$  913 ( $\text{M}+\text{H}$ )<sup>+</sup>. Anal. Calcd for  $\text{C}_{46}\text{H}_{32}\text{N}_4\text{O}_{14}\text{Ti}$ : C, 60.54; H, 3.53; N, 6.14. Found: C, 60.46; H, 3.60; N, 6.14.

**(Hox)Ti(O<sub>2</sub>C<sub>12</sub>H<sub>4</sub>[NO<sub>2</sub>]<sub>4</sub>)**. This compound was prepared by the procedure described above using (Hox)Ti(O<sup>*i*</sup>Pr)<sub>2</sub> (0.0686 g, 0.139 mmol) and 3,3',5,5'-tetranitro-2,2'-

dihydroxybiphenyl (0.0514 g, 0.140 mmol). After stirring for 5 min, the resulting yellow precipitate was filtered, washed with  $2 \times 1$  mL of hexanes and dried *in vacuo* for 1 h. Yield: 0.0873 g (85%).  $^1\text{H}$  NMR ( $\text{CD}_2\text{Cl}_2$ ):  $\delta$  2.82 (s, 6H,  $\text{NCH}_3$ ), 3.57 (d, 16 Hz, 2H,  $\text{CHH}'$ ), 4.21 (d, 16 Hz, 2H,  $\text{CHH}'$ ), 7.30 (m, 2H, biphenyl  $\text{ArH}$ ), 7.50 (m, 6H, biphenyl  $\text{ArH}$ ), 8.39 (d, 2.5 Hz, 2H, 6,6'-H biphenolate), 8.69 (d, 2.5 Hz, 2H, 4,4'-H biphenolate). The compound was too insoluble for  $^{13}\text{C}$  NMR analysis. IR ( $\text{cm}^{-1}$ ): 3082 (w), 2916 (w), 1592 (m), 1535 (s), 1520 (s), 1462 (m), 1424 (m), 1346 (s), 1270 (m), 1093 (w), 953 (m), 912 (m), 850 (m), 824 (w), 744 (m). FABMS:  $m/z$  739 ( $\text{M}+\text{H}$ ) $^+$ . Anal. Calcd for  $\text{C}_{30}\text{H}_{22}\text{N}_6\text{O}_{14}\text{Ti}$ : C, 48.80; H, 3.00; N, 11.38. Found: C, 48.70; H, 3.56; N, 11.47.

**(Hob)Ti(O<sub>2</sub>C<sub>12</sub>H<sub>4</sub>[NO<sub>2</sub>]<sub>4</sub>)**. This compound was prepared by the procedure described above using (Hob)Ti(O<sup>i</sup>Pr)<sub>2</sub> (0.0525 g, 0.090 mmol) and 3,3',5,5'-tetranitro-2,2'-dihydroxybiphenyl (0.0334 g, 0.091 mmol). After stirring for 5 min, hexanes (10 mL) was added. The resulting yellow precipitate was filtered, washed with  $2 \times 1$  mL of hexanes and dried *in vacuo* for 1h. Yield: 0.0358 g (48%).  $^1\text{H}$  NMR ( $\text{CD}_2\text{Cl}_2$ ):  $\delta$  2.41 (s, 3H, tolyl  $\text{CH}_3$ ), 2.61 (s, 3H,  $\text{NCH}_3$ ), 3.41 (d, 15.5 Hz, 1H,  $\text{CH}_c\text{H}_d\text{COCHCOTol}$ ), 3.61 (d, 15.5 Hz, 1H,  $\text{CH}_a\text{H}_b\text{CON}(\text{CH}_3)\text{O}$ ), 4.12 (d, 15.5 Hz, 1H,  $\text{CH}_c\text{H}_d\text{COCHCOTol}$ ), 4.25 (d, 15.5 Hz, 1H,  $\text{CH}_a\text{H}_b\text{CON}(\text{CH}_3)\text{O}$ ), 5.95 (s, 1H,  $\text{COCHCO}$ ), 7.23 (d, 8.5 Hz, 2H, Tol 3,5-H), 7.31 (td, 7.5, 1.5 Hz, 1H, 4- or 4'-H biphenyl), 7.33 (d, 7.5 Hz, 1H, 3- or 3'-H biphenyl), 7.37 (d, 8.5 Hz, 2H, Tol 2,6-H), 7.41 (d, 7.5 Hz, 1H, 3- or 3'-H biphenyl), 7.48 (td, 7.5, 1.5 Hz, 2H, 5- and 5'-H biphenyl), 7.52 (m, 2H, Ar-H biphenyl), 7.57 (dd, 7.5, 1.5 Hz, 1H, 6- or 6'-H biphenyl), 8.42 (d, 3 Hz, 1H, 6-H biphenolate), 8.48 (d, 3 Hz, 1H, 6'-H biphenolate), 8.72 (d, 3 Hz, 1H, 4-H biphenolate), 8.86 (d, 3 Hz, 1H, 4'-H biphenolate).  $^{13}\text{C}\{^1\text{H}\}$  NMR ( $\text{CD}_2\text{Cl}_2$ ):  $\delta$  22.09 (tolyl  $\text{CH}_3$ ), 34.86 ( $\text{NCH}_3$ ), 39.02 ( $\text{CH}_2$  hydroxamate), 45.77 ( $\text{CH}_2$  diketonate), 105.54 ( $\text{COCHCO}$ ), 122.07,

122.62, 128.71, 128.74, 129.14, 129.20, 129.95, 130.10, 130.16, 130.21, 130.35, 130.49, 130.78, 131.98, 133.56, 134.19, 134.80, 135.25, 136.49, 139.35, 139.87, 140.09, 140.32, 140.81, 145.99, 146.07, 160.57, 161.89, 165.26 (CO hydroxamate), 182.61 (CO diketonate), 194.85 (CO diketonate). IR (cm<sup>-1</sup>): 3085 (w), 1579 (m), 1536 (s), 1519 (s), 1498 (m), 1460 (m), 1422 (m), 1337 (s), 1269 (m), 1186 (w), 1092 (m), 986 (w), 952 (w), 913 (w), 850 (m), 835 (m), 744 (m), 708 (m), 668 (m). FABMS: *m/z* 826 (M+H)<sup>+</sup>. Anal. Calcd for C<sub>38</sub>H<sub>27</sub>N<sub>5</sub>O<sub>14</sub>Ti: C, 55.29; H, 3.30; N, 8.48. Found: C, 54.67; H, 3.71; N, 6.51.

**(Bob)Ti(O<sub>2</sub>C<sub>12</sub>H<sub>4</sub>'Bu<sub>4</sub>).** In the drybox, (Bob)Ti(O<sup>*i*</sup>Pr)<sub>2</sub> (0.0710 g, 0.106 mmol), 3,3',5,5'-tetra-*tert*-butyl-2,2'-dihydroxybiphenyl (0.0444 g, 0.108 mmol), 5 mL toluene and a magnetic stirbar were added into a 25 mL round bottom flask, which was then sealed with a rubber septum. The flask was taken out of the drybox and connected to a condenser topped with a nitrogen-flushed tee vented to a bubbler. The mixture was heated with stirring in a 108 °C oil bath overnight, yielding a clear brown solution. The toluene was evaporated and the brown residue was redissolved in methylene chloride and purified by column chromatography on silica gel using 4:1 hexanes/ethyl acetate as eluent. The solvent was evaporated from the eluate and the solid suspended in 2 mL of hexanes. After stirring the suspension for 5 min, the brown solid was filtered, washed with 2 × 1 mL of hexanes and dried *in vacuo* for 1 h to yield 12.0 mg of the biphenoxide complex (12%). <sup>1</sup>H NMR (CD<sub>2</sub>Cl<sub>2</sub>): δ 1.30 (s, 18H, C(CH<sub>3</sub>)<sub>3</sub>), 1.38 (s, 18H, C(CH<sub>3</sub>)<sub>3</sub>), 2.37 (s, 6H, tolyl CH<sub>3</sub>), 3.21 (d, 14 Hz, 2H, CHH'), 4.07 (d, 14 Hz, 2H, CHH'), 5.55 (s, 2H, COCHCO), 7.08 (dd, 7.5, 1.5 Hz, 2H, 3-H biphenyl), 7.09 (d, 8 Hz, 4H, Tol 3,5-H), 7.13 (td, 7.5, 1.5 Hz, 2H, 4-H biphenyl), 7.15 (d, 2.5 Hz, 2H, 6,6'-H biphenolate), 7.29 (d, 8 Hz, 4H, Tol 2,6-H), 7.38 (d, 2.5 Hz, 2H, 4,4'-H biphenolate), 7.42 (dd, 7.5, 1.5 Hz, 2H, 6-H biphenyl), 7.48 (td, 7.5, 1.5 Hz, 2H, 5-H biphenyl). <sup>13</sup>C{<sup>1</sup>H} NMR (CD<sub>2</sub>Cl<sub>2</sub>): δ 21.92 (tolyl CH<sub>3</sub>), 31.09

(C(CH<sub>3</sub>)<sub>3</sub>), 32.03 (C(CH<sub>3</sub>)<sub>3</sub>), 34.93 (C(CH<sub>3</sub>)<sub>3</sub>), 35.77 (C(CH<sub>3</sub>)<sub>3</sub>), 46.37 (CH<sub>2</sub>), 102.55 (COCHCO), 123.36, 127.57, 128.47, 128.79, 128.91, 129.28, 130.03, 130.09, 132.42, 133.59, 134.98, 137.22, 140.83, 143.29, 143.73, 161.58, 180.95 (CO), 191.17 (CO). IR (cm<sup>-1</sup>): 2953 (m), 2903 (w), 2868 (w), 1592 (m), 1546 (m), 1519 (s), 1498 (s), 1422 (w), 1361 (m), 1323 (m), 1298 (w), 1283 (w), 1263 (w), 1242 (w), 1184 (m), 1097 (m), 985 (m), 861 (m), 775 (m), 751 (m). FABMS: *m/z* 957 (M+H)<sup>+</sup>. Anal. Calcd for C<sub>62</sub>H<sub>68</sub>O<sub>6</sub>Ti: C, 77.81; H, 7.16. Found: C, 78.03; H, 7.69.

**(Hox)Ti(O<sub>2</sub>C<sub>12</sub>H<sub>4</sub>'Bu<sub>4</sub>).** This compound was prepared by the procedure described for (Bob)Ti(O<sub>2</sub>C<sub>12</sub>H<sub>4</sub>'Bu<sub>4</sub>) using (Hox)Ti(O<sup>*i*</sup>Pr)<sub>2</sub> (0.0980 g, 0.199 mmol) and 3,3',5,5'-tetra-*tert*-butyl-2,2'-dihydroxybiphenyl (0.0823 g, 0.200 mmol), except that the eluent used for chromatography was 2:1 hexanes/ethyl acetate. Yield: 0.0418 g (27%). <sup>1</sup>H NMR (CD<sub>2</sub>Cl<sub>2</sub>): δ 1.32 (s, 18H, C(CH<sub>3</sub>)<sub>3</sub>), 1.37 (s, 18H, C(CH<sub>3</sub>)<sub>3</sub>), 2.72 (s, 6H, NCH<sub>3</sub>), 3.42 (d, 16 Hz, 2H, CHH'), 4.10 (d, 16 Hz, 2H, CHH'), 6.99 (d, 2.5 Hz, 2H, 4-H biphenolate), 7.29 (m, 2H, Ar-H biphenyl), 7.29 (d, 2.5 Hz, 2H, 6-H biphenolate), 7.43 (m, 6H, Ar-H biphenyl). <sup>13</sup>C{<sup>1</sup>H} NMR (CD<sub>2</sub>Cl<sub>2</sub>): δ 31.19 (C(CH<sub>3</sub>)<sub>3</sub>), 31.92 (C(CH<sub>3</sub>)<sub>3</sub>), 34.79 (C(CH<sub>3</sub>)<sub>3</sub>), 34.83 (NCH<sub>3</sub>), 35.73 (C(CH<sub>3</sub>)<sub>3</sub>), 38.27 (CH<sub>2</sub>), 123.69, 128.17, 128.19, 128.57, 129.34, 130.02, 133.88, 134.41, 135.72, 139.69, 142.62, 159.49, 164.82 (CO). IR (cm<sup>-1</sup>): 2953 (s), 2906 (m), 2868 (w), 1590 (s, ν<sub>CO</sub>), 1479 (m), 1427 (s), 1402 (m), 1390 (w), 1361 (w), 1269 (s), 1242 (s), 1136 (w), 1097 (w), 995 (w), 914 (w), 880 (w), 852 (m), 822 (w), 796 (w), 765 (w), 753 (s), 744 (s), 668 (w). FABMS: *m/z* 783 (M+H)<sup>+</sup>. Anal. Calcd for C<sub>46</sub>H<sub>58</sub>N<sub>2</sub>O<sub>6</sub>Ti: C, 70.58; H, 7.47; N, 3.58. Found: C, 71.17; H, 7.73; N, 3.23.

**(Hob)Ti(O<sub>2</sub>C<sub>12</sub>H<sub>4</sub>'Bu<sub>4</sub>).** This compound was prepared by the procedure described for (Bob)Ti(O<sub>2</sub>C<sub>12</sub>H<sub>4</sub>'Bu<sub>4</sub>) using (Hob)Ti(O<sup>*i*</sup>Pr)<sub>2</sub> (0.0887 g, 0.153 mmol) and 3,3',5,5'-tetra-*tert*-butyl-2,2'-dihydroxybiphenyl (0.0630 g, 0.153 mmol). In this case, chromatography was not necessary, instead the deep red residue was purified by suspending in 4 mL of hexanes, filtering,

and washing with  $2 \times 1$  mL of hexanes. After drying *in vacuo* 1 h, 0.0949 g of the complex was isolated (71%).  $^1\text{H}$  NMR ( $\text{CD}_2\text{Cl}_2$ ):  $\delta$  1.20 (s, 9H,  $\text{C}(\text{CH}_3)_3$ ), 1.32 (s, 9H,  $\text{C}(\text{CH}_3)_3$ ), 1.37 (s, 9H,  $\text{C}(\text{CH}_3)_3$ ), 1.43 (s, 9H,  $\text{C}(\text{CH}_3)_3$ ), 2.34 (s, 3H, tolyl  $\text{CH}_3$ ), 2.62 (s, 3H,  $\text{NCH}_3$ ), 3.31 (d, 15 Hz, 1H,  $\text{CH}_c\text{H}_d\text{COCHCOTol}$ ), 3.42 (d, 15.5 Hz, 1H,  $\text{CH}_a\text{H}_b\text{CON}(\text{CH}_3)\text{O}$ ), 4.08 (d, 15 Hz, 1H,  $\text{CH}_c\text{H}_d\text{COCHCOTol}$ ), 4.11 (d, 15.5 Hz, 1H,  $\text{CH}_a\text{H}_b\text{CON}(\text{CH}_3)\text{O}$ ), 5.70 (s, 1H,  $\text{COCHCO}$ ), 7.03 (d, 2.5 Hz, 1H, 4-H biphenolate), 7.04 (d, 8 Hz, 2H, Tol 3,5-H), 7.06 (d, 2.5 Hz, 1H, 4'-H biphenolate), 7.15 (d, 8 Hz, 2H, Tol 2,6-H), 7.24 (dd, 7.5, 2 Hz, 1H, 3- or 3'-H biphenyl), 7.29 (td, 7.5, 2 Hz, 1H, 4- or 4'-H biphenyl), 7.30 (d, 2.5 Hz, 1H, 6-H biphenolate), 7.31 (dd, 7.5, 2 Hz, 1H, 3- or 3'-H biphenyl), 7.37 (dd, 7.5, 2.0 Hz, 1H, 6- or 6'-H biphenyl), 7.40 (d, 2.5 Hz, 1H, 6'-H biphenolate), 7.40 (td, 7.5, 2 Hz, 1H, 4- or 4'-H biphenyl), 7.41 (dd, 7.5, 2 Hz, 1H, 6- or 6'-H biphenyl), 7.42 (td, 7.5, 2 Hz, 1H, 5- or 5'-H biphenyl), 7.48 (td, 7.5, 2 Hz, 1H, 5- or 5'-H biphenyl).  $^{13}\text{C}\{^1\text{H}\}$  NMR ( $\text{CD}_2\text{Cl}_2$ ):  $\delta$  21.89 (tolyl  $\text{CH}_3$ ), 30.99 ( $\text{C}(\text{CH}_3)_3$ ), 31.18 ( $\text{C}(\text{CH}_3)_3$ ), 31.95 ( $\text{C}(\text{CH}_3)_3$ ), 32.05 ( $\text{C}(\text{CH}_3)_3$ ), 34.84 ( $\text{C}(\text{CH}_3)_3$ ), 34.91 ( $\text{C}(\text{CH}_3)_3$ ), 34.94 ( $\text{NCH}_3$ ), 35.65 ( $\text{C}(\text{CH}_3)_3$ ), 35.84 ( $\text{C}(\text{CH}_3)_3$ ), 38.56 ( $\text{CH}_2$  hydroxamate), 46.24 ( $\text{CH}_2$  diketonate), 101.53 ( $\text{COCHCO}$ ), 123.33, 123.62, 127.58, 128.02, 128.04, 128.33, 128.38, 128.58, 128.64, 128.70, 129.27, 129.91, 130.33, 130.56, 132.62, 133.44, 134.01, 134.44, 134.88, 135.61, 137.51, 139.89, 140.52, 142.70, 143.48, 143.60, 160.32, 160.84, 163.88 ( $\text{CO}$  hydroxamate), 180.29 ( $\text{CO}$  diketonate), 192.90 ( $\text{CO}$  diketonate). IR ( $\text{cm}^{-1}$ ): 2953 (s), 2906 (m), 2868 (m), 1587 (s,  $\nu_{\text{CO}}$ ), 1561 (m), 1520 (s), 1498 (s), 1476 (m), 1422 (m), 1402 (w), 1362 (m), 1329 (w), 1266 (m), 1243 (m), 1185 (w), 1134 (w), 1128 (w), 1098 (m), 879 (w), 860 (m), 765 (w), 752 (m), 742 (m). FABMS:  $m/z$  870 ( $\text{M}+\text{H}$ ) $^+$ . Anal. Calcd for  $\text{C}_{54}\text{H}_{63}\text{NO}_6\text{Ti}$ : C, 74.55; H, 7.30; N, 1.61. Found: C, 75.04; H, 8.05; N, 1.40.

## II. X-ray Crystallography

**X-ray crystallography of (Bob)Ti(O<sub>2</sub>C<sub>12</sub>H<sub>4</sub>[CH<sub>3</sub>])<sub>4</sub> • 0.5 C<sub>6</sub>H<sub>14</sub>.** Crystals were grown from a saturated solution of the complex in hexanes at room temperature. An arbitrary sphere of data was collected at beamline 11.3.1 at the Advanced Light Source, Lawrence Berkeley National Laboratory, on a red plate-like crystal, having approximate dimensions of 0.04 × 0.03 × 0.01 mm, on a Bruker APEX-II diffractometer using a combination of  $\omega$ - and  $\phi$ -scans of 0.3° at 150(2) K. Data were reduced, correcting for absorption and polarization, and the space group was assigned using standard methods.<sup>6</sup> The structure was solved by direct methods, and nonhydrogen atoms not apparent in the initial solution were found on subsequent difference Fourier maps. The model was refined by full-matrix least-squares analysis of  $F^2$  against all reflections. All non-hydrogen atoms were refined with anisotropic thermal displacement parameters. Hydrogen atoms were included in calculated positions, with thermal parameters for the hydrogens tied to the isotropic thermal parameter of the atom to which they are bonded (1.5 × for methyl, 1.2 × for all others). Calculations used SHELXTL (Bruker AXS),<sup>S7</sup> with scattering factors and anomalous dispersion terms taken from the literature.<sup>S8</sup> Further details about the structure are in Table S1.

**X-ray crystallography of (Hox)Ti(O<sub>2</sub>C<sub>12</sub>H<sub>4</sub>[CH<sub>3</sub>])<sub>4</sub> • CD<sub>2</sub>Cl<sub>2</sub>, (Hob)Ti(O<sub>2</sub>C<sub>12</sub>H<sub>4</sub>[CH<sub>3</sub>])<sub>4</sub> • CDCl<sub>3</sub> and (Hob)Ti(O<sub>2</sub>C<sub>12</sub>H<sub>4</sub>[NO<sub>2</sub>])<sub>4</sub> • 2 CHCl<sub>3</sub>.** (Hox)Ti(O<sub>2</sub>C<sub>12</sub>H<sub>4</sub>[CH<sub>3</sub>])<sub>4</sub> • CD<sub>2</sub>Cl<sub>2</sub> and (Hob)Ti(O<sub>2</sub>C<sub>12</sub>H<sub>4</sub>[CH<sub>3</sub>])<sub>4</sub> • CDCl<sub>3</sub> were grown from concentrated solutions of CD<sub>2</sub>Cl<sub>2</sub> and CDCl<sub>3</sub> respectively at room temperature. Crystals of (Hob)Ti(O<sub>2</sub>C<sub>12</sub>H<sub>4</sub>[NO<sub>2</sub>])<sub>4</sub> • 2 CHCl<sub>3</sub> were grown by layering of hexanes over a concentrated solution of the complex in CHCl<sub>3</sub>. The crystals were placed in inert oil and transferred to a nylon loop in the cold N<sub>2</sub> stream of a Bruker Apex CCD diffractometer ( $T = 100$  K). Data reduction, structure solution and refinement were performed as

described above, except for the treatment of hydrogen atoms. In these structures, the hydrogen atoms were found on difference Fourier maps and refined isotropically, except for the hydrogens on methyl groups C58 and C68 in (Hob)Ti(O<sub>2</sub>C<sub>12</sub>H<sub>4</sub>[CH<sub>3</sub>])<sub>4</sub> • CDCl<sub>3</sub>, which were placed in calculated positions. One of the chloroforms of solvation in (Hob)Ti(O<sub>2</sub>C<sub>12</sub>H<sub>4</sub>[NO<sub>2</sub>])<sub>4</sub> • 2 CDCl<sub>3</sub> was disordered over two orientations (the major refined to 88.2(2)% occupancy). Details about the structures are in Table S2.

**Table S1.** Crystal data for (Bob)Ti(O<sub>2</sub>C<sub>12</sub>H<sub>4</sub>[CH<sub>3</sub>])<sub>4</sub> • 0.5 C<sub>6</sub>H<sub>14</sub>.

|                                                     | (Bob)Ti(O <sub>2</sub> C <sub>12</sub> H <sub>4</sub> [CH <sub>3</sub> ]) <sub>4</sub> • 0.5 C <sub>6</sub> H <sub>14</sub> |
|-----------------------------------------------------|-----------------------------------------------------------------------------------------------------------------------------|
| Molecular formula                                   | C <sub>53</sub> H <sub>51</sub> O <sub>6</sub> Ti                                                                           |
| Formula weight                                      | 831.84                                                                                                                      |
| <i>T</i> / K                                        | 150(2)                                                                                                                      |
| $\lambda$ / Å                                       | 0.77490                                                                                                                     |
| Crystal system                                      | Triclinic                                                                                                                   |
| Space group                                         | <i>P</i> $\bar{1}$                                                                                                          |
| Total data collected                                | 11691                                                                                                                       |
| No. of indep reflns.                                | 3568                                                                                                                        |
| <i>R</i> <sub>int</sub>                             | 0.0619                                                                                                                      |
| Obsd. refls. [ <i>I</i> > 2σ( <i>I</i> )]           | 2563                                                                                                                        |
| <i>a</i> / Å                                        | 9.5360(15)                                                                                                                  |
| <i>b</i> / Å                                        | 10.7745(17)                                                                                                                 |
| <i>c</i> / Å                                        | 21.214(3)                                                                                                                   |
| $\alpha$ / °                                        | 87.903(2)                                                                                                                   |
| $\beta$ / °                                         | 87.712(3)                                                                                                                   |
| $\gamma$ / °                                        | 88.606(2)                                                                                                                   |
| <i>V</i> / Å <sup>3</sup>                           | 2175.9(6)                                                                                                                   |
| <i>Z</i>                                            | 2                                                                                                                           |
| Cryst size / mm                                     | 0.04 × 0.03 × 0.01                                                                                                          |
| No. refined params.                                 | 547                                                                                                                         |
| R indices [ <i>I</i> > 2σ( <i>I</i> )] <sup>a</sup> | <i>R</i> 1 = 0.0400, <i>wR</i> 2 = 0.0927                                                                                   |
| R indices (all data) <sup>a</sup>                   | <i>R</i> 1 = 0.0677, <i>wR</i> 2 = 0.1056                                                                                   |
| Goodness of fit                                     | 1.003                                                                                                                       |

<sup>a</sup> *R*1 =  $\sum \|F_o\| - \|F_c\| / \sum \|F_o\|$ ; *wR*2 =  $(\sum [w(F_o^2 - F_c^2)^2] / \sum w(F_o^2)^2)^{1/2}$ .

**Table S2.** Crystal data for (Hox)Ti(O<sub>2</sub>C<sub>12</sub>H<sub>4</sub>[CH<sub>3</sub>])<sub>4</sub> • CD<sub>2</sub>Cl<sub>2</sub>, (Hob)Ti(O<sub>2</sub>C<sub>12</sub>H<sub>4</sub>[CH<sub>3</sub>])<sub>4</sub> • CDCl<sub>3</sub> and (Hob)Ti(O<sub>2</sub>C<sub>12</sub>H<sub>4</sub>[NO<sub>2</sub>])<sub>4</sub> • 2 CDCl<sub>3</sub>.

|                                                              | (Hox)Ti(O <sub>2</sub> C <sub>12</sub> H <sub>4</sub> [CH <sub>3</sub> ]) <sub>4</sub> •<br>CD <sub>2</sub> Cl <sub>2</sub> | (Hob)Ti(O <sub>2</sub> C <sub>12</sub> H <sub>4</sub> [CH <sub>3</sub> ]) <sub>4</sub> •<br>CDCl <sub>3</sub> | (Hob)Ti(O <sub>2</sub> C <sub>12</sub> H <sub>4</sub> [NO <sub>2</sub> ]) <sub>4</sub> •<br>2 CHCl <sub>3</sub> |
|--------------------------------------------------------------|-----------------------------------------------------------------------------------------------------------------------------|---------------------------------------------------------------------------------------------------------------|-----------------------------------------------------------------------------------------------------------------|
| Molecular formula                                            | C <sub>35</sub> H <sub>34</sub> D <sub>2</sub> Cl <sub>2</sub> N <sub>2</sub> O <sub>6</sub> Ti                             | C <sub>43</sub> H <sub>40</sub> Cl <sub>3</sub> NO <sub>6</sub> Ti                                            | C <sub>40</sub> H <sub>29</sub> Cl <sub>6</sub> N <sub>5</sub> O <sub>14</sub> Ti                               |
| Formula weight                                               | 701.46                                                                                                                      | 822.01                                                                                                        | 1064.28                                                                                                         |
| <i>T</i> / K                                                 | 100(2)                                                                                                                      | 99(2)                                                                                                         | 100(2)                                                                                                          |
| $\lambda$ / nm                                               | 0.71073 (Mo K $\alpha$ )                                                                                                    | 0.71073 (Mo K $\alpha$ )                                                                                      | 0.71073 (Mo K $\alpha$ )                                                                                        |
| Crystal system                                               | Monoclinic                                                                                                                  | Triclinic                                                                                                     | Triclinic                                                                                                       |
| Space group                                                  | <i>P</i> 2 <sub>1</sub> / <i>n</i>                                                                                          | <i>P</i> $\bar{1}$                                                                                            | <i>P</i> $\bar{1}$                                                                                              |
| Total data collected                                         | 47756                                                                                                                       | 28893                                                                                                         | 33459                                                                                                           |
| No. of indep reflns.                                         | 6802                                                                                                                        | 7854                                                                                                          | 9014                                                                                                            |
| <i>R</i> <sub>int</sub>                                      | 0.0411                                                                                                                      | 0.0326                                                                                                        | 0.0516                                                                                                          |
| Obsd. refls. [ <i>I</i> > 2 $\sigma$ ( <i>I</i> )]           | 5763                                                                                                                        | 6583                                                                                                          | 6501                                                                                                            |
| <i>a</i> / Å                                                 | 12.3148(13)                                                                                                                 | 12.0648(5)                                                                                                    | 11.2931(4)                                                                                                      |
| <i>b</i> / Å                                                 | 13.2234(14)                                                                                                                 | 12.6467(5)                                                                                                    | 13.3440(5)                                                                                                      |
| <i>c</i> / Å                                                 | 20.372(2)                                                                                                                   | 14.4497(14)                                                                                                   | 15.1141(6)                                                                                                      |
| $\alpha$ / °                                                 | 90                                                                                                                          | 109.3684(14)                                                                                                  | 96.792(2)                                                                                                       |
| $\beta$ / °                                                  | 94.7950(16)                                                                                                                 | 96.4954(15)                                                                                                   | 102.423(2)                                                                                                      |
| $\gamma$ / °                                                 | 90                                                                                                                          | 106.9980(17)                                                                                                  | 93.434(3)                                                                                                       |
| <i>V</i> / Å <sup>3</sup>                                    | 3305.9(6)                                                                                                                   | 1934.4(2)                                                                                                     | 2200.11(14)                                                                                                     |
| <i>Z</i>                                                     | 4                                                                                                                           | 2                                                                                                             | 2                                                                                                               |
| Cryst size / mm                                              | 0.29 × 0.10 × 0.08                                                                                                          | 0.26 × 0.20 × 0.16                                                                                            | 0.145 × 0.08 × 0.07                                                                                             |
| No. refined params.                                          | 559                                                                                                                         | 625                                                                                                           | 718                                                                                                             |
| R indices [ <i>I</i> > 2 $\sigma$ ( <i>I</i> )] <sup>a</sup> | <i>R</i> 1 = 0.0307,<br><i>wR</i> 2 = 0.0792                                                                                | <i>R</i> 1 = 0.0374,<br><i>wR</i> 2 = 0.0932                                                                  | <i>R</i> 1 = 0.0449,<br><i>wR</i> 2 = 0.1020                                                                    |
| R indices (all data) <sup>a</sup>                            | <i>R</i> 1 = 0.0392,<br><i>wR</i> 2 = 0.0846                                                                                | <i>R</i> 1 = 0.0473,<br><i>wR</i> 2 = 0.0993                                                                  | <i>R</i> 1 = 0.0746,<br><i>wR</i> 2 = 0.1150                                                                    |
| Goodness of fit                                              | 1.030                                                                                                                       | 1.037                                                                                                         | 1.024                                                                                                           |

<sup>a</sup> *R*1 =  $\sum ||F_o| - |F_c|| / \sum |F_o|$ ; *wR*2 =  $(\sum [w(F_o^2 - F_c^2)^2] / \sum w(F_o^2)^2)^{1/2}$ .

### III. DFT Calculations

#### A. General considerations

All calculations employed the hybrid B3LYP method, with a 6-31G\* basis set for all atoms, using the Gaussian03 suite of programs.<sup>S9</sup> Optimized geometries were confirmed to be minima by frequency analysis. While the symmetries of the molecules were not constrained in the calculation, the final geometries of (acac)<sub>2</sub>TiCl<sub>2</sub> and (CH<sub>3</sub>CON[CH<sub>3</sub>]O)<sub>2</sub>TiCl<sub>2</sub> were extremely close to C<sub>2</sub> symmetry. The Kohn-Sham orbital representations were created in GaussView (v. 3.09) using a contour value of 0.03.

#### B. (acac)<sub>2</sub>TiCl<sub>2</sub> (*cis*)

Energy of optimized structure: -2460.50833 a.u.

Cartesian coordinates of optimized structure:

| Center<br>Number | Atomic<br>Number | Coordinates (Angstroms) |           |           |
|------------------|------------------|-------------------------|-----------|-----------|
|                  |                  | X                       | Y         | Z         |
| 1                | 22               | 0.000127                | -0.730878 | -0.000443 |
| 2                | 8                | 0.669488                | 0.819216  | -1.172252 |
| 3                | 8                | -0.671434               | 0.814463  | 1.176011  |
| 4                | 8                | 1.706349                | -0.477309 | 0.892879  |
| 5                | 8                | -1.706277               | -0.476791 | -0.893407 |
| 6                | 6                | 2.738524                | 0.277574  | 0.723560  |
| 7                | 6                | 2.822597                | 1.234613  | -0.283007 |
| 8                | 1                | 3.725513                | 1.825641  | -0.370195 |
| 9                | 6                | 1.772888                | 1.453372  | -1.198234 |
| 10               | 6                | 1.918391                | 2.478422  | -2.295281 |
| 11               | 1                | 2.854676                | 3.036598  | -2.222574 |
| 12               | 1                | 1.877948                | 1.969726  | -3.265536 |
| 13               | 1                | 1.073634                | 3.174792  | -2.261072 |
| 14               | 6                | 3.864586                | 0.045964  | 1.693656  |
| 15               | 1                | 4.706677                | 0.719125  | 1.517524  |
| 16               | 1                | 3.496478                | 0.180468  | 2.716987  |
| 17               | 1                | 4.205703                | -0.992236 | 1.609923  |
| 18               | 6                | -1.774712               | 1.448857  | 1.202278  |
| 19               | 6                | -2.823218               | 1.232928  | 0.285039  |
| 20               | 6                | -2.738339               | 0.278106  | -0.723587 |
| 21               | 6                | -3.863508               | 0.048908  | -1.695293 |
| 22               | 1                | -4.705318               | 0.722372  | -1.518969 |
| 23               | 1                | -3.494169               | 0.184829  | -2.717990 |
| 24               | 1                | -4.205474               | -0.989183 | -1.613651 |
| 25               | 6                | -1.921247               | 2.471024  | 2.301868  |
| 26               | 1                | -1.078665               | 3.170062  | 2.267469  |

|    |    |           |           |           |
|----|----|-----------|-----------|-----------|
| 27 | 1  | -1.877287 | 1.960422  | 3.270938  |
| 28 | 1  | -2.859266 | 3.026644  | 2.232073  |
| 29 | 1  | -3.726102 | 1.823943  | 0.372642  |
| 30 | 17 | -0.764756 | -2.208688 | 1.541208  |
| 31 | 17 | 0.767231  | -2.202437 | -1.547070 |

**C. (CH<sub>3</sub>CON[CH<sub>3</sub>]O)<sub>2</sub>TiCl<sub>2</sub> (*cis*-**α**, equatorial carbonyls)**

Energy of minimized structure: -2416.29569 a.u.

Cartesian coordinates of optimized structure:

| Center<br>Number | Atomic<br>Number | Coordinates (Angstroms) |           |           |
|------------------|------------------|-------------------------|-----------|-----------|
|                  |                  | X                       | Y         | Z         |
| 1                | 22               | -0.000017               | 0.729457  | 0.000015  |
| 2                | 8                | -0.890822               | -0.871199 | 1.053742  |
| 3                | 8                | -1.651852               | 0.389301  | -0.943331 |
| 4                | 8                | 0.891058                | -0.870851 | -1.054024 |
| 5                | 8                | 1.651855                | 0.389367  | 0.943319  |
| 6                | 17               | 0.635784                | 2.181437  | -1.619240 |
| 7                | 17               | -0.636089               | 2.180999  | 1.619563  |
| 8                | 7                | -2.453396               | -0.614974 | -0.489183 |
| 9                | 7                | 2.453516                | -0.614747 | 0.489035  |
| 10               | 6                | -2.787121               | -2.365632 | 1.230721  |
| 11               | 1                | -2.202315               | -2.743638 | 2.069931  |
| 12               | 1                | -3.752393               | -2.009920 | 1.606879  |
| 13               | 1                | -2.973251               | -3.184833 | 0.528183  |
| 14               | 6                | -2.007029               | -1.249479 | 0.587892  |
| 15               | 6                | -3.673929               | -0.799639 | -1.247201 |
| 16               | 1                | -4.257118               | 0.125606  | -1.220825 |
| 17               | 1                | -4.255991               | -1.614925 | -0.815802 |
| 18               | 1                | -3.419733               | -1.033094 | -2.285319 |
| 19               | 6                | 2.787427                | -2.365220 | -1.231005 |
| 20               | 1                | 2.203833                | -2.741484 | -2.071834 |
| 21               | 1                | 2.971177                | -3.185559 | -0.529138 |
| 22               | 1                | 3.753868                | -2.010182 | -1.604745 |
| 23               | 6                | 2.007263                | -1.249120 | -0.588165 |
| 24               | 6                | 3.673801                | -0.799777 | 1.247358  |
| 25               | 1                | 3.419282                | -1.033666 | 2.285297  |
| 26               | 1                | 4.257040                | 0.125454  | 1.221554  |
| 27               | 1                | 4.255947                | -1.614918 | 0.815793  |

**D. (CH<sub>3</sub>CON[CH<sub>3</sub>]O)(acac)TiCl<sub>2</sub> (*cis*, equatorial carbonyl)**

Energy of optimized structure: -2438.40123 a.u.

Cartesian coordinates of optimized structure:

| Center<br>Number | Atomic<br>Number | Coordinates (Angstroms) |           |           |
|------------------|------------------|-------------------------|-----------|-----------|
|                  |                  | X                       | Y         | Z         |
| 1                | 22               | -0.050194               | -0.702846 | 0.225039  |
| 2                | 8                | 0.750721                | 1.031989  | 0.986033  |
| 3                | 8                | 1.588985                | -0.675834 | -0.840709 |
| 4                | 8                | -0.841834               | 0.631422  | -1.207268 |
| 5                | 8                | -1.750343               | -0.182939 | 0.948302  |
| 6                | 17               | -0.812001               | -2.470102 | -1.004538 |
| 7                | 17               | 0.570463                | -1.800265 | 2.093463  |
| 8                | 7                | -2.542501               | 0.640489  | 0.206050  |
| 9                | 6                | 2.045180                | 2.923449  | 1.553877  |
| 10               | 1                | 1.167967                | 3.576987  | 1.497218  |
| 11               | 1                | 2.932387                | 3.476207  | 1.236158  |
| 12               | 1                | 2.160937                | 2.630799  | 2.603940  |
| 13               | 6                | 1.809341                | 1.686800  | 0.721862  |
| 14               | 6                | 2.737535                | 1.303610  | -0.266256 |
| 15               | 1                | 3.609849                | 1.921682  | -0.437952 |
| 16               | 6                | 2.585644                | 0.127376  | -0.994697 |
| 17               | 6                | -2.758495               | 1.931409  | -1.899714 |
| 18               | 1                | -2.042671               | 2.324752  | -2.622744 |
| 19               | 1                | -3.517685               | 1.356583  | -2.442552 |
| 20               | 1                | -3.252513               | 2.765731  | -1.393798 |
| 21               | 6                | -2.010442               | 1.043288  | -0.942985 |
| 22               | 6                | -3.850872               | 0.886717  | 0.779006  |
| 23               | 1                | -3.729918               | 1.346089  | 1.764313  |
| 24               | 1                | -4.420405               | 1.549817  | 0.127210  |
| 25               | 1                | -4.378784               | -0.065089 | 0.888601  |
| 26               | 6                | 3.602366                | -0.307693 | -2.015388 |
| 27               | 1                | 3.109852                | -0.432875 | -2.986252 |
| 28               | 1                | 4.424233                | 0.405587  | -2.112182 |
| 29               | 1                | 4.002897                | -1.287673 | -1.731976 |

## References

- (S1) O. Diels and A. Bibergeil, *Chem. Ber.* 1902, **35**, 302-313.
- (S2) J. van Alphen, *Rec. Trav. Chim. Pays-Bas*, 1932, **51**, 179-184.
- (S3) (a) A. van der Linden, C. J. Schaverien, N. Meijboom, C. Ganter and A. G. Orpen, *J. Am. Chem. Soc.*, 1995, **117**, 3008-3021. (b) T. Yamato, K. Hasegawa, Y. Saruwatari and L. K. Doamekpor, *Chem. Ber.*, 1993, **126**, 1435-1439.
- (S4) V. Ugrinova, B. C. Noll and S. N. Brown, *Inorg. Chem.*, 2006, **45**, 10309-10320.
- (S5) N. Kongprakaiwoot, B. C. Noll and S. N. Brown, *Inorg. Chem.*, 2008, **47**, 11902-11909.
- (S6) Bruker AXS, *APEX2* and *SAINT*, 2008, Bruker-Nonius AXS, Madison, Wisconsin, USA.
- (S7) G. M. Sheldrick, *Acta Cryst. A*, 2008, **A64**, 112-122.
- (S8) *International Tables for Crystallography*; Kluwer Academic Publishers: Dordrecht, The Netherlands, 1992, Vol C.
- (S9) M. J. Frisch, G. W. Trucks, H. B. Schlegel, G. E. Scuseria, M. A. Robb, J. R. Cheeseman, J. A. Montgomery, T. Vreven, K. N. Kudin, J. C. Burant, J. M. Millam, S. S. Iyengar, J. Tomasi, V. Barone, B. Mennucci, M. Cossi, G. Scalmani, N. Rega, G. A. Petersson, H. Nakatsuji, M. Hada, M. Ehara, K. Toyota, R. Fukuda, J. Hasegawa, M. Ishida, T. Nakajima, Y. Honda, O. Kitao, H. Nakai, M. Klene, X. Li, J. E. Knox, H. P. Hratchian, J. B. Corss, C. Adamo, J. Jaramillo, R. Gomperts, R. E. Stratmann, O. Yazyev, A. J. Austin, R. Cammi, C. Pomelli, J. W. Ochterski, P. Y. Ayala, K. Morokuma, G. A. Voth, P. Salvador, J. J. Dannenberg, V. G. Zakrzewski, S. Dapprich, A. D. Daniels, M. C. Strain, O. Farkas, D. K. Malick, A. D. Rabuck, K. Raghavachari, J. B. Foresman, J. V. Ortiz, Q. Cui, A. G. Baboul, S. Clifford, J. Cioslowski, B. B. Stefanov, G. Liu, A. Liashenko, P.

---

Piskorz, I. Komaromi, R. L. Martin, D. J. Fox, T. Keith, M. A. Al-Laham, C. Y. Peng, A. Nanayakkara, M. Challacombe, P. M. W. Gill, B. Johnson, W. Chen, M. W. Wong, C. Gonzalez and J. A. Pople, *Gaussian 03, Revision C.01*, Gaussian Inc., Wallingford CT, 2004.
